# Supplementary material for: Does washing insecticide-treated nets 20 times for experimental hut evaluations provide a suitable proxy for their end-of-life performance under household conditions?
Source: Research Square preprint supplement (doi:10.21203/rs.3.rs-5216975/v1), 2024-10-07
Supplement: Supplementary file 1 [file 270b53506a28bc067c8f6e60.docx]

**Table 1** Entry, exiting and inside net results of wild, pyrethroid-resistant *Anopheles gambiae* sensu lato entering experimental huts in Covè, southern Benin. **Values in the same column bearing the same letter do not differ significantly at the 5% level, according to regression analysis. CIs=confidence intervals.*

| **Net type** | **Net status** | **Mean hole index** | ***N* collected*** | **% Deterrence**  **(95% CIs)** | ***N* inside veranda** | **% Exophily***  **(95% CIs)** | ***N* inside net** | **% Inside net***  **(95% CIs)** |
| --- | --- | --- | --- | --- | --- | --- | --- | --- |
| Untreated net (control) | ̶ | 138.0 | 882a | ̶ | 358 | 40.6a (37.4-43.8) | 346 | 39.2a (36.0-32.4) |
| Interceptor® | New unwashed | 138.0 | 753b | 14.6 (5.6-26.3) | 441 | 58.6b (55.1-62.1) | 144 | 19.1bc (16.3-21.9) |
| Washed 20 times | 138.0 | 1522c | -72.6 (-83.5--61.7) | 750 | 49.3c (46.8-51.8) | 498 | 32.7d (30.3-35.1) |
| Field-aged 3 years | 454.2 | 706de | 20.0 (11.1-28.9) | 472 | 66.9de (63.4-70.4) | 1 | 0.1e (0.0-0.3) |
| PermaNet® 3.0 | New unwashed | 138.0 | 504de | 42.9 (34.6-51.2) | 378 | 75.0f (71.2-78.8) | 65 | 12.9f (10.0-15.8) |
| Washed 20 times | 138.0 | 1292cf | -46.5 (-56.9--36.1) | 845 | 65.4d (62.8-68.0) | 222 | 17.2bc (15.1-19.3) |
| Field-aged 3 years | 369.3 | 823b | 6.7 (-2.5-15.9) | 589 | 71.6ef (68.5-74.7) | 9 | 1.1g (0.4-1.8) |
| Royal Guard® | New unwashed | 138.0 | 1201f | -36.2 (-46.3--26.1) | 883 | 73.5f (71.0-76.0) | 91 | 7.6h (6.1-9.1) |
| Washed 20 times | 138.0 | 1492c | -69.2 (-80.0--58.4) | 879 | 58.9b (56.4-61.4) | 357 | 23.9i (21.7-26.1) |
| Field-aged 3 years | 500.2 | 974a | -10.4 (-20.0--0.8) | 729 | 74.8f (72.1-77.5) | 3 | 0.3e (0.0-0.6) |
| Interceptor® G2 | New unwashed | 138.0 | 828be | 6.1 (-3.1-15.3) | 521 | 62.9bd (59.6-66.2) | 135 | 16.3b (13.8-18.8) |
| Washed 20 times | 138.0 | 1141f | -29.4 (-39.4--19.4) | 670 | 58.7b (55.8-66.2) | 259 | 22.7ci (20.3-25.1) |
| Field-aged 3 years | 566.2 | 850be | 3.6 (-5.6-12.8) | 587 | 69.1de (55.8-61.6) | 5 | 0.6eg (0.1-1.1) |
