# Supplementary material for: Does washing insecticide-treated nets 20 times for experimental hut evaluations provide a suitable proxy for their end-of-life performance under household conditions?
Source: Research Square preprint supplement (doi:10.21203/rs.3.rs-5216975/v1), 2024-10-07
Supplement: Supplementary file 2 [file 48adadcd79c94702ab85c003.docx]

**Table 2** Blood-feeding results of wild, pyrethroid-resistant *Anopheles gambiae* sensu lato entering experimental huts in Covè, southern Benin. **Values in the same column bearing the same letter do not differ significantly at the 5% level, according to regression analysis. CIs=confidence intervals.*

| **Net type** | **Net status** | **Mean hole index** | ***N* collected*** | ***N* blood-fed** | **% Blood-feeding***  **(95% CIs)** | **% Blood-feeding inhibition**  **(95% CIs)** |
| --- | --- | --- | --- | --- | --- | --- |
| Untreated net (control) | ̶ | 138.0 | 882a | 506 | 57.4a (54.1-60.7) | ̶ |
| Interceptor® | New unwashed | 138.0 | 753b | 397 | 52.7b (49.1-56.3) | 8.2 (3.1-13.3) |
| Washed 20 times | 138.0 | 1522c | 820 | 53.9a (51.4-56.4) | 6.1 (1.4-10.8) |
| Field-aged 3 years | 454.2 | 706de | 206 | 29.2c (25.8-32.6) | 49.1 (44.1-54.1) |
| PermaNet® 3.0 | New unwashed | 138.0 | 504de | 146 | 29.0c (25.0-33.0) | 49.5 (44.2-54.8) |
| Washed 20 times | 138.0 | 1292cf | 536 | 41.5d (38.8-44.2) | 27.7 (22.9-32.5) |
| Field-aged 3 years | 369.3 | 823b | 203 | 24.7ce (21.8-27.6) | 57.0 (52.1-61.9) |
| Royal Guard® | New unwashed | 138.0 | 1201f | 234 | 19.5e (17.3-21.7) | 66.0 (61.4-70.6) |
| Washed 20 times | 138.0 | 1492c | 829 | 55.6a (53.1-58.1) | 3.1 (-1.6-7.8) |
| Field-aged 3 years | 500.2 | 974a | 262 | 26.9c (24.1-29.7) | 53.1 (48.3-57.9) |
| Interceptor® G2 | New unwashed | 138.0 | 828be | 352 | 42.5d (39.1-45.9) | 26.0 (21.0-31.0) |
| Washed 20 times | 138.0 | 1141f | 528 | 46.3d (43.4-49.2) | 19.3 (14.4-24.2) |
| Field-aged 3 years | 566.2 | 850be | 314 | 36.9f (33.7-40.1) | 35.7 (30.7-40.7) |
