# Supplementary material for: Does washing insecticide-treated nets 20 times for experimental hut evaluations provide a suitable proxy for their end-of-life performance under household conditions?
Source: Research Square preprint supplement (doi:10.21203/rs.3.rs-5216975/v1), 2024-10-07
Supplement: Supplementary file 3 [file e80015015cafb0caaabfb21a.docx]

**Table 4** Impact on fertility against wild, pyrethroid-resistant *Anopheles gambiae* sensu lato entering experimental huts in Covè, southern Benin. **Values in the same column bearing the same letter do not differ significantly at the 5% level, according to regression analysis.*

| **Net type** | **Net status** | **Mean hole index** | ***N* dissected** | ***N* fertile** | **% Fertility***  **(95% CIs)** | **% Reduction in fertility** |
| --- | --- | --- | --- | --- | --- | --- |
| Untreated net (control) | ̶ | 138.0 | 448 | 439 | 98.0a (96.7-99.3) | ̶ |
| Interceptor® | New unwashed | 138.0 | 368 | 355 | 96.5ab (94.6-98.4) | 1.5 (-2.0-5.0) |
| Washed 20 times | 138.0 | 770 | 735 | 95.5bc (94.0-97.0) | 2.6 (-0.7-5.9) |
| Field-aged 3 years | 454.2 | 190 | 185 | 97.4abcd (95.1-99.7) | 0.6 (-3.1-4.3) |
| PermaNet® 3.0 | New unwashed | 138.0 | 115 | 100 | 87.0d (80.9-93.1) | 11.2 (5.9-16.5) |
| Washed 20 times | 138.0 | 478 | 451 | 94.4bc (92.3-96.5) | 3.7 (0.1-7.3) |
| Field-aged 3 years | 369.3 | 186 | 174 | 93.5abcd (90.0-97.0) | 4.6 (0.3-8.9) |
| Royal Guard® | New unwashed | 138.0 | 151 | 30 | 19.9e (13.5-26.3) | 79.7 (74.3-85.1) |
| Washed 20 times | 138.0 | 782 | 597 | 76.3f (73.3-79.3) | 22.1 (18.0-26.2) |
| Field-aged 3 years | 500.2 | 249 | 174 | 69.9f (64.2-75.6) | 28.7 (23.5-33.9) |
| Interceptor® G2 | New unwashed | 138.0 | 201 | 190 | 94.5bcd (91.3-97.7) | 3.6 (-0.5-7.7) |
| Washed 20 times | 138.0 | 329 | 316 | 96.0ab (93.9-98.1) | 2.0 (-1.6-5.6) |
| Field-aged 3 years | 566.2 | 290 | 271 | 93.4cd (90.5-96.3) | 4.7 (0.7-8.7) |
