# Supplementary material for: Does washing insecticide-treated nets 20 times for experimental hut evaluations provide a suitable proxy for their end-of-life performance under household conditions?
Source: Research Square preprint supplement (doi:10.21203/rs.3.rs-5216975/v1), 2024-10-07
Supplement: Supplementary file 4 [file f030b4c7415ac0f53b7420d1.docx]

**Table 3** Mortality results of wild, pyrethroid-resistant *Anopheles gambiae* sensu lato entering experimental huts in Covè, southern Benin. **Values in the same column bearing the same letter do not differ significantly at the 5% level, according to regression analysis. CIs=confidence intervals.*

| **Net type** | **Net status** | **Mean hole index** | ***N* collected*** | ***N* dead 72 h** | **% Mortality 72 h***  **(95% CIs)** |
| --- | --- | --- | --- | --- | --- |
| Untreated net (control) | ̶ | 138.0 | 882a | 9 | 1.0a (0.3-1.7) |
| Interceptor® | New unwashed | 138.0 | 753b | 74 | 9.8b (7.7-11.9) |
| Washed 20 times | 138.0 | 1522c | 148 | 9.7b (8.2-11.2) |
| Field-aged 3 years | 454.2 | 706de | 75 | 10.6b (8.3-12.9) |
| PermaNet® 3.0 | New unwashed | 138.0 | 504de | 163 | 32.3c (28.2-36.4) |
| Washed 20 times | 138.0 | 1292cf | 153 | 11.8b (10.0-13.6) |
| Field-aged 3 years | 369.3 | 823b | 146 | 17.7d (15.1-20.3) |
| Royal Guard® | New unwashed | 138.0 | 1201f | 435 | 36.2c (33.5-38.9) |
| Washed 20 times | 138.0 | 1492c | 139 | 9.3b (7.8-10.8) |
| Field-aged 3 years | 500.2 | 974a | 133 | 13.7b (11.5-15.9) |
| Interceptor® G2 | New unwashed | 138.0 | 828be | 510 | 61.6e (58.3-64.9) |
| Washed 20 times | 138.0 | 1141f | 621 | 54.4f (51.5-57.3) |
| Field-aged 3 years | 566.2 | 850be | 163 | 19.2d (16.6-21.8) |
